# Supplementary material
Source: PubMed Central journal article supplement (PMC10795591)
Supplement: NIHMS1932849-supplement-1.pdf [file NIHMS1932849-supplement-1.pdf]

**Cell Reports Physical Science, Volume 4**

**Supplemental information**

**Rapid and accurate detection of herpes simplex  
virus type 2 using a low-cost  
electrochemical biosensor**

**Lucas F. de Lima, André L. Ferreira, Sita Awasthi, Marcelo D.T. Torres, Harvey M. Friedman, Gary H. Cohen, William R. de Araujo, and Cesar de la Fuente-Nunez**

**Cell Reports Physical Science, Volume 4**

**Supplemental information**

**Rapid and accurate detection of herpes simplex  
virus type 2 using a low-cost  
electrochemical biosensor**

**Lucas F. de Lima, André L. Ferreira, Sita Awasthi, Marcelo D.T. Torres, Harvey M. Friedman, Gary H. Cohen, William R. de Araujo, and Cesar de la Fuente-Nunez**

## SUPPLEMENTARY FIGURES

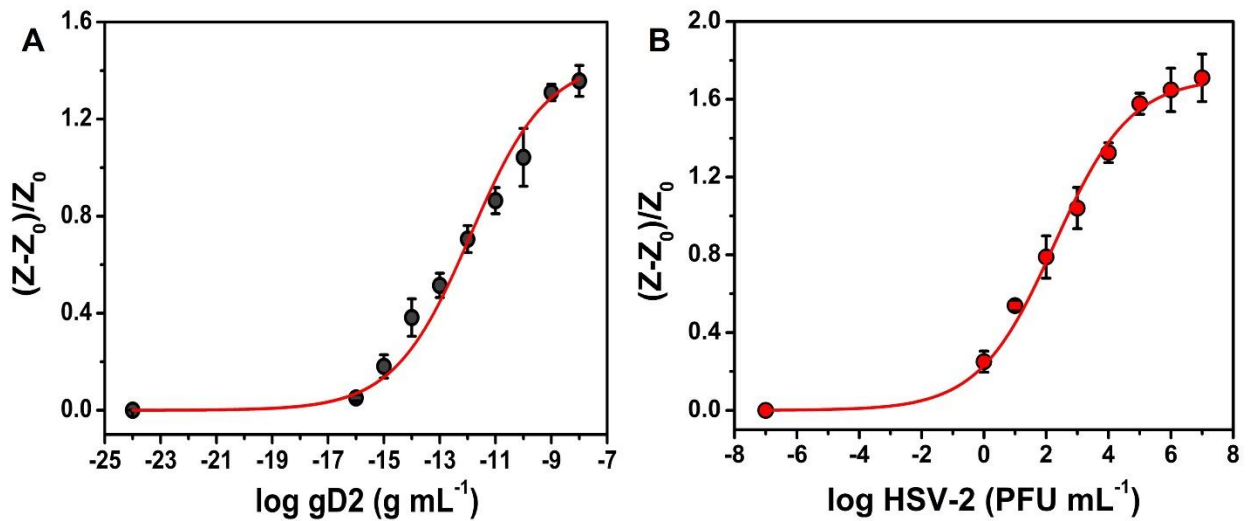

**Figure S1: Normalized analytical curves plotted to calculate the limit of detection using the four-parameter logistic 4PL method. A)** Dose-response curve obtained by normalizing RCT values extracted from Nyquist plots as a function of the logarithm of the gD2 concentration. **B)** Dose-response curve obtained from normalized RCT values extracted from Nyquist plots as a function of the logarithm of the HSV-2 viral loads. The EIS measurements were carried out in triplicate in  $5.0 \text{ mmol L}^{-1} [\text{Fe}(\text{CN})_6]^{-3/4}$  and a  $0.1 \text{ mol L}^{-1} \text{ KCl}$  solution applying the open circuit potential at a frequency range of  $1 \times 10^5 \text{ Hz}$  to  $0.1 \text{ Hz}$  and using an amplitude of  $10 \text{ mV}$ . All measurements were recorded using  $10 \mu\text{L}$  of gD2 or HSV-2 samples (ranging from  $1 \times 10^0 \text{ PFU mL}^{-1}$  to  $1 \times 10^7 \text{ PFU mL}^{-1}$ ) and incubated for 5 minutes on the biosensor surface. The error bars correspond to the standard deviation.

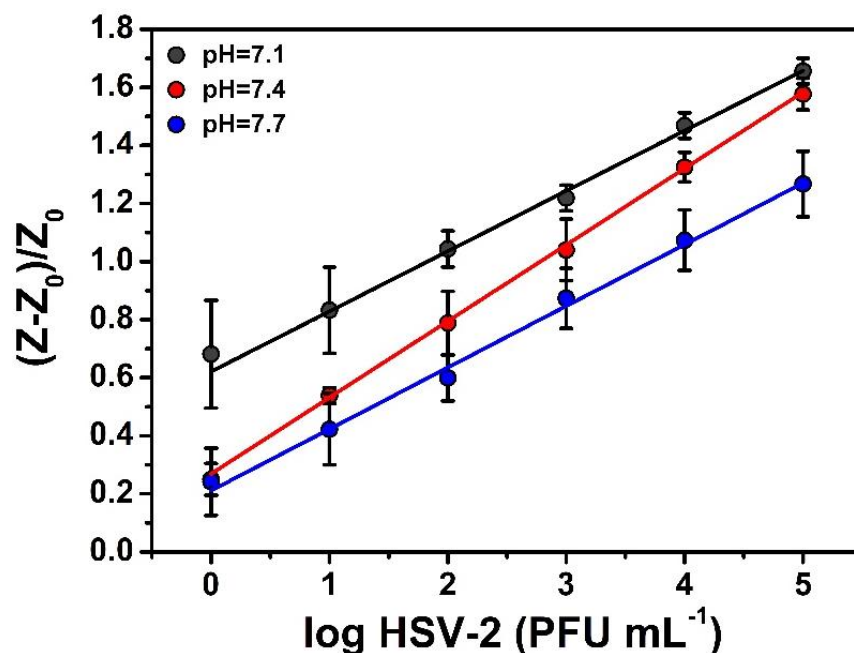

**Figure S2: Effect of pH on the analytical response of the nectin-1 biosensor.** Experiments were performed in DMEM medium with pH values adjusted to 7.1, 7.4, and 7.7. The dose-response curves were recorded in triplicate at a concentration ranging from  $1 \times 10^0$  to  $1 \times 10^5$  PFU mL<sup>-1</sup>. The HSV-2 sample at pH= 7.1, 7.4, and 7.0 presented analytical sensitivity values of  $0.212 \pm 0.008$ ,  $0.263 \pm 0.003$ , and  $0.207 \pm 0.008$ , respectively. The EIS analyses were recorded in a medium containing  $5.0 \text{ mmol L}^{-1}$   $[\text{Fe}(\text{CN})_6]^{3-/4}$  and  $0.1 \text{ mol L}^{-1}$  KCl solution at a frequency ranging from  $1 \times 10^5$  Hz to 0.1 Hz and 10 mV of amplitude. Ten  $\mu\text{L}$  of each HSV-2 sample was incubated on the biosensor surface for 5 minutes before each EIS measurement. The error bars correspond to the standard deviation.

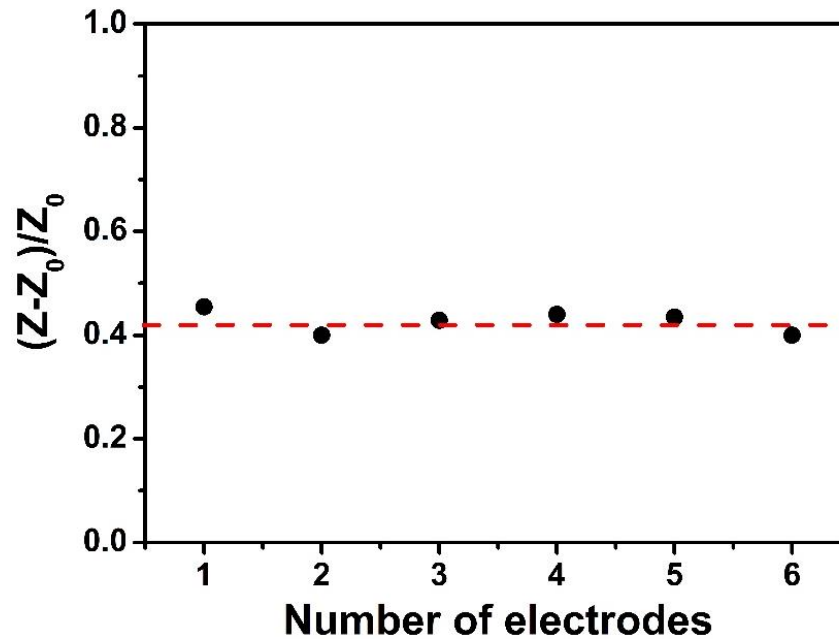

**Figure S3: Reproducibility study.** Analytical response ( $(Z-Z_0)/Z_0$ ) obtained for 6 different biosensors (from different fabrication batches) when incubated with  $1 \times 10^{-9}$  g mL $^{-1}$  of gD2 prepared in 0.1 mol L $^{-1}$  PBS (pH = 7.4) for 5 minutes. A relative standard deviation (RSD) of 5.12%, indicative of excellent reproducibility, was obtained to assess the fabrication and functionalization method. The error bars correspond to the standard deviation.

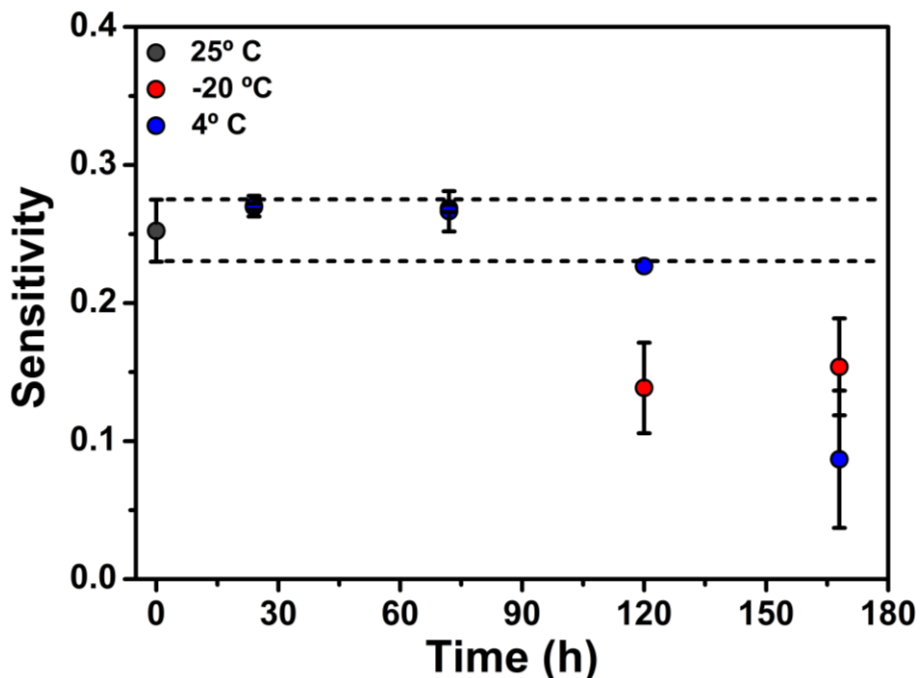

**Figure S4: Stability assays.** Biosensor stability at different temperatures was assessed by extracting the analytical sensitivity parameters from dose-response curves recorded in triplicate. Electrodes were stored for 7 days at: 25 °C (black circles), -20 °C (red circles), and 4 °C (blue circles). The sensitivity values were obtained by analytical curves at concentrations of gD2 ranging from  $1 \times 10^{-12}$  g mL<sup>-1</sup> to  $1 \times 10^{-10}$  g mL<sup>-1</sup>. All experiments were performed in triplicate (3 different biosensors) in 5.0 mmol L<sup>-1</sup> [Fe(CN)<sub>6</sub>]<sup>3-/4-</sup> prepared in 0.1 mol L<sup>-1</sup> KCl medium at a frequency window between  $1 \times 10^5$  Hz and 0.1 Hz and 10 mV of amplitude. A volume of 10 μL of HSV-2 was used in each case, and samples were incubated for 5 minutes on the surface of the biosensor prior to conducting EIS measurements. The error bars correspond to the standard deviation.

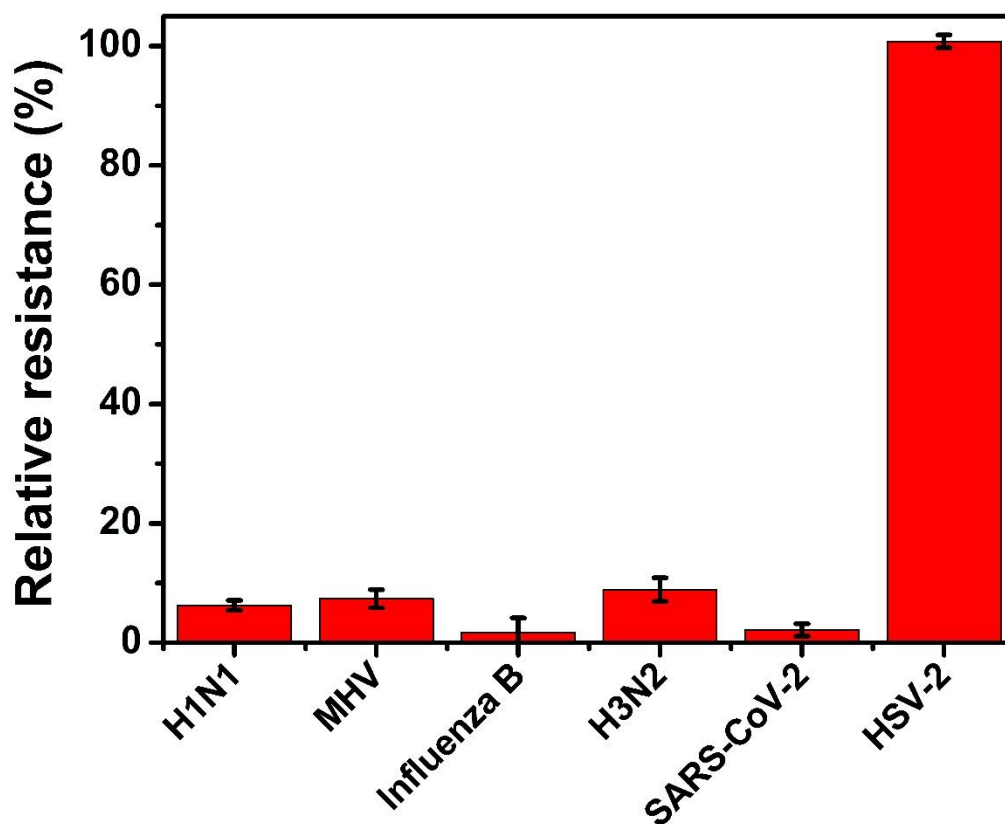

**Figure S5: Selectivity study of the biosensor.** Cross-reactivity assays were performed to assess the selectivity of the biosensor for HSV-2 as opposed to other viruses. The following viruses were used in our studies: H1N1 strain A/California, MHV – mouse hepatitis virus, Influenza B – B/Colorado, H3N2 – A/ Nicaragua, SARS-CoV-2, and HSV-2 – herpes simplex virus-2. All viruses were at concentrations of  $10^5$  PFU mL<sup>-1</sup> except for MHV, which was at  $10^8$  PFU mL<sup>-1</sup>. Experiments were recorded using 5.0 mmol L<sup>-1</sup> [Fe(CN)<sub>6</sub>]<sup>3-/4-</sup> in 0.1 mol L<sup>-1</sup> KCl medium at a frequency range between  $1 \times 10^5$  Hz and 0.1 Hz and an amplitude of 10 mV. Ten  $\mu$ L of each viral sample was deposited on the WE and incubated for 5 minutes prior to performing EIS measurements. The error bars correspond to the standard deviation.
